# Supplementary material for: Astym treatment vs. eccentric exercise for lateral elbow tendinopathy: a randomized controlled clinical trial
Source: PeerJ. 2015 May 19;3:e967. doi: 10.7717/peerj.967 (PMC4451036; doi:10.7717/peerj.967)
Supplement: Supplemental Information 2 [file peerj-03-967-s002.xlsx]

## Sheet: Sheet1
Subject_#	age	Gender	Gender1	InitiTx	Cross	History	Resolut	Breakout	VASRest	VASactiv	Function	GSPainfr	GSMax	VASR4	VASAct4	Funct4	GSpainf4	GSMax4	VASR8	VASAct8	Funct8	GSPainf8	GSMax8	VASR12	VASAct12	Funct12	GSPainf12	GSMax12	VASR6mo	VASA6mo	Funct6mo	VASR12mo	VASA12mo	Funct12m	DASH0	DASH4	DASH8	DASH12	filter_$	gainVASrest	gainVASactive	gainGSpainfree	gainfunction	gainGSmax	gainDASH	GVASP	GVASAP	GFUNCTP	GGpainfP
1	50	F	1	1	2	1	1	1.1	8.6	10	8	25	35	4	6	5	30	42											0.1	0.1	9.5	0	0	10	56.6667	29.1667			1	4.6	4	-5	3	-7	27.5
2	47	F	1	1	1	2	3	3.1				50	55	2.5	8.5	5	20	40	4.5	8	4.5	20	35	0.3	0.3	8.5	30	51	0.5	0.5	9.5	0	0.5	9	28.3333	31.6667	35	14.1667				30		15	-3.33333	4.2	7.7	-4	-10
3	52	M	2	2	2	3	1	1.1						0.5	1	9.5	55	72.5											0.1	0.5	9.5	0	0	10	15	12.5									2.5
4	51	F	1	1	2	1	2	2.1				15	32	4.5	6	5	22	40	0.2	0.5	10	30	50						0	0	10	0	0	10	19.1667	13.3333	3.33333					-7		-8	5.83333
5	50	F	1	2	3	5	7	7.1				30	50																						29.1667
6	41	F	1	1	1	2	3	3.1				20	47	0.2	7.8	5.5	10	30	0.5	4.5	5	5	42	0	0.3	10	20	40	0	0	10	0	0	10	17.5	15	10.8333	1.66667				10		17	2.5	0.5	4.2	-5	-15
7	53	F	1	2	2	3	1	1.1	3	5	10	15	42	0.2	1	10	20	63											0	0.3	10	0	0	10	24.1667	1.66667			1	2.8	4	-5	0	-21	22.5
8	44	F	1	1	2	1	1	1.1				25	70	0.5	1.5	8	50	80											0	0.5	9	0.1	0.5	9.7	21.6667	9.16667						-25		-10	12.5
9	51	F	1	2	2	3	1	1.3				30	35	0.2	0.5	9.5	20	40																	25.8333	12.5						10		-5	13.3333
10	32	F	1	1	3	5	7	7.1				18	30																						39.1667
11	42	M	2	2	2	3	2	2.1				125	130	2	4	9	140	140	0.3	2	9.5	130	130						1	4	9	1.5	3	9	7.5	11.6667	3.33333					-15		-10	-4.16667
12	33	F	1	2	2	3	2	2.1	9	9.5	0.1	15	40	6	8	5	40	47	0	2.5	8.5	55	55						0	0	10	0	0	10	55	24.1667	15		1	3	1.5	-25	-4.9	-7	30.8333
13	47	F	1	1	3	5	7	7.1																											16.6667
14				2	2	3	2	2.1	9.5	10	0.1	22	35	5	7	6	40	45	0	1.5	9.5	60	62						0.1	0.1	10			10	61.6667	34.1667	12.5		1	4.5	3	-18	-5.9	-10	27.5
15	51	F	1	2	2	3	5	5.1	7	7	10	25	25	7	7	5	22	24	7	7	7	0	35						1	1	10	0	0	10	36.6667	45.8333	40		1	0	0	3	5	1	-9.16667
16	49	F	1	2	2	3	1	1.1				35	40	1	5	8	57	60											1.5	2	8	0	0	9	37.5	18.3333						-22		-20	19.1667
17	53	M	2	2	2	3	1	1.3	2.5	5	10	85	127	2.5	2.5	8	110	115																	20	16.6667			1	0	2.5	-25	2	12	3.33333
19	48	M	2	2	2	3	1	1.1	0	5	5	95	110	0	2	10	120	120											3.5	5	8.5	6	9	4.5	9.16667	5			1	0	3	-25	-5	-10	4.16667
20	48	M	2	1	1	2	3	3.1	1	7.9	4	10	110	0.3	6	7.3	65	100	0.9	6.2	7	45	115	0.5	2	8	50	100	0.2	0.2	9.9	0	0	10	36.6667	24.1667	36.6667	16.6667	1	0.7	1.9	-55	-3.3	10	12.5	0.4	4.2	-1	-5
21	55	F	1	2	2	3	1	1.1	3	6	6	5	40	3	3	8	42	55																	39.1667	19.1667			1	0	3	-37	-2	-15	20
22	55	F	1	1	1	2	3	3.1	2	2.5	9.8	45	70	1	4	10	45	65	1	2	9	45	65	1	3	10	60	62	0	0.4	10	0.5	1	10	20.8333	12.5	11.6667	4.16667	1	1	-1.5	0	-0.2	5	8.33333	0	-1	-1	-15
23	60	M	2	1	1	2	3	3.1	4	4	4	50	110	1.5	5	10	95	102	1.2	7.3	7.5	110	125	0.5	1.5	9.3	115	120	1	1	9	0.3	1.7	4.8	17.5	34.1667	25	11.6667	1	2.5	-1	-45	-6	8	-16.6667	0.7	5.8	-1.8	-5
24				1	1	2	6	6.2	5	5	5	62	80	1.5	7.5	10	70	100	2.6	4.5	4.9	65	94	3	7.5	6.3	47	85							25	35.8333	35.8333		1	3.5	-2.5	-8	-5	-20	-10.8333	-0.4	-3	-1.4	18
26	54	F	1	1	1	2	3	3.1	0	0.3	0.3	35	62	0.4	1.5	0.8	30	55	1.8	1.5	2.1	30	42	0.5	1	9.3			1.1	0	9.3	0.5	0.8	9.1	18.3333	16.6667	16.6667	6.66667	1	-0.4	-1.2	5	-0.5	7	1.66667	1.3	0.5	-7.2
27	54	F	1	2	2	3	1	1.1	5	6.5	6	45	65	0	3	9.5	75	80											4	4	3	1	2	9.5	27.5	9.16667			1	5	3.5	-30	-3.5	-15	18.3333
28	46	F	1	1	3	5	7	7.1	5	7	4	35	40																						57.5				1
29	53	F	1	2	2	3	1	1.2	8	10		45	50	0	0.2		50	50													9.7				68.3333	8.33333			1	8	9.8	-5		0	60
30	56	M	2	2	2	3	5	5.1	3	5	7.5	65	115	2	7.5	3	5	92.5	5	8.5	1.5	5	93						0.8	2.2	10	0	0.2	10	25	38.3333	45		1	1	-2.5	60	4.5	22.5	-13.3333
31	42	M	2	2	2	3	2	2.1	5	7.5	1	90	120	2	5	5	115	135	0.2	0.5	9								0	0	10	0	0	10	25.8333	20	7.5		1	3	2.5	-25	-4	-15	5.83333
32	54	M	2	2	2	3	1	1.3	2.5	2.5	7.5	60	80	0	0	10	70	85																	6.66667	0.833333			1	2.5	2.5	-10	-2.5	-5	5.83333
33	45	M	2	2	2	3	5	5.1	1	7	4	45	70	0	3	7.5	90	110	0	4	7.5	32	38						0.5	2	8	0	1	9	26.6667	12.5	16.6667		1	1	4	-45	-3.5	-40	14.1667
34	44	M	2	2	2	3	1	1.1	3	4.5	7	10	80	0	2.5	10	54	120											0	0	10	0	0	10	30.8333	2.5			1	3	2	-44	-3	-40	28.3333
35	43	F	1	2	2	3	1	1.1	5	9	2	20	35	0.5	5	4	32	55											0	1	10	0	2	9	64.1667	42.5			1	4.5	4	-12	-2	-20	21.6667
36	45	M	2	1	2	1	1	1.1	2.5	6	5	80	120	0	0	9.5	120	120											0	0	10	0	0	10	19.1667	1.66667			1	2.5	6	-40	-4.5	0	17.5
37	44	F	1	1	2	1	2	2.2	2	7	6.5	22.5	40	2.5	3	8.5	40	62	0	0.5	9.6	58	62												35	20	7.5		1	-0.5	4	-17.5	-2	-22	15
38	49	M	2	2	3	5	7	7.1	2	5	5	20	50																						34.1667				1
39				1	3	5	7	7.1	1	3	6	10	30																						27.5				1
40	57	M	2	2	2	3	2	2.1	3	9	5	20	30	3	4.5	6	35	40	0	1	9	33	33						0	0	10	0	0	10	42.5	15	5		1	0	4.5	-15	-1	-10	27.5
41	43	F	1	1	2	1	2	2.1	0	0.3	9.3	20	25	0.5	3.5	8.5	30	35	0	1	9.3	40	45						0	0	10	0	0	10	10	7.5	2.5		1	-0.5	-3.2	-10	0.8	-10	2.5
42	56	M	2	2	2	3	1	1.1	0	3.3	7.5	22	50	1	1	8.5	40	65											0	0	10	0	0	10	17.5	4.16667			1	-1	2.3	-18	-1	-15	13.3333
43	35	M	2	1	2	1	4	4.2	1.5	7.5	8.5	80	150	1	2	9	130	170																	20	9.16667			1	0.5	5.5	-50	-0.5	-20	10.8333
44	52	F	1	1	2	1	2	2.1	7.5	9		15	25	5	7	4	5	25	2.5	3	8	12	40						0	1	9	0	0	10	55	26.6667	23.3333		1	2.5	2	10		0	28.3333
45				1	2	1	2	2.1	2.5	2.5	9	30	60	3	5	7.5	10	25	2.5	4	7.5	12	42						0	1	9	0	0	10	13.3333	15	23.3333		1	-0.5	-2.5	20	1.5	35	-1.66667
46	55	M	2	2	2	3	2	2.1	2	3	7	40	105	2	3	9	60	110	0	0.5	10	90	122						0	0	10	0.1	0	10	15	14.1667	0.833333		1	0	0	-20	-2	-5	0.833333
47	46	M	2	2	2	3	1	1.1	4	7.5	5	30	175	3	6	5	135												0	0	10	0	0	10	38.3333	25			1	1	1.5	-105	0		13.3333
48	41	M	2	2	3	5	7	7.1	4	6	8	45	90																						28.3333				1
49	45	F	1	2	2	3	1	1.1	0.5	3	9	20	70	0	2.5	9.5	20	65											0	2	9	0	0.5	10	12.5	10			1	0.5	0.5	0	-0.5	5	2.5
50	46	F	1	1	1	2	3	3.1	1	5	0.5	20	50	0.2	0.6	1	8	12	2.5	5	4.5	10	18	0.5	1	5	5	10	0	0	9	0	0	10	28.3333	41.6667	32.5	27.5	1	0.8	4.4	12	-0.5	38	-13.3333	2	4	-0.5	5
51	46	F	1	2	2	3	1	1.1	1.5	2	7.5	20	60	0	0.5	9.5	32	52											0	0	10	0	0	9.1	17.5	3.33333			1	1.5	1.5	-12	-2	8	14.1667
52	50	M	2	2	2	3	1	1.1	1	2.5	8	60	95			10	110	110											0	0	10	0	0	10	14.1667	1.66667			1			-50	-2	-15	12.5
53	49	M	2	2	2	3	1	1.1	0	2.5	8	80	120	0	1	9	130	130											0	0	10	0	0	10	10	5			1	0	1.5	-50	-1	-10	5
54	61	M	2	2	2	3	1	1.1	0.5	0.5		98	98	0	1	9.5	80	82											0	1	9	0		10	13.3333	5			1	0.5	-0.5	18		16	8.33333
55	49	F	1	1	2	1	2	2.3	1	2.5	8	15	32	0.5	2	7	40	45											0	0.5	9.5	0	0.5	9.5	30.8333	11.6667			1	0.5	0.5	-25	1	-13	19.1667
56	50	M	2	1	2	1	1	1.1	0.5	3	9	30	110	0	1	9.5	100	122											0	0.1	10	0	0	10	13.3333	5			1	0.5	2	-70	-0.5	-12	8.33333
57	40	F	1	2	2	3	5	5.5	0.5	5.5	8	70	80	1	7	4	40	65	2	7.5	8.5	20	22												24.1667	27.5	20.8333		1	-0.5	-1.5	30	4	15	-3.33333
58	55	F	1	1	3	5	7	7.1	5	5	5	20	30																						32.5				1
59	30	M	2	1	3	5	7	7.1	2	6	6	20	80																						41.6667				1
61	50	F	1	2	2	3	1	1.1	2	7	5	17	38	2	4	7.5	55	70											0	1	9.2	0	1	9.8	34.1667	11.6667			1	0	3	-38	-2.5	-32	22.5
62	39	M	2	1	1	2	3	3.1	1.5	7	5	25	92	5	7	7.5	20	55	3	6	7.5	15	90	1.5	1.5	8.5	55	110	1.5	1	9.5	0	0	10	35.8333	23.3333	25.8333	13.3333	1	-3.5	0	5	-2.5	37	12.5	1.5	4.5	-1	-40
63	55	F	1	1	2	1	1	1.1	3	6	0.5	30	45	0	1.5	9.5	11	26											0	0	10	0	0	9	19.1667	15.8333			1	3	4.5	19	-9	19	3.33333
64	52	F	1	1	1	2	3	3.1	5	8	5	0	25	0	2.5	10	30	30	1	2	10	20	40	0	1	10	30	35	0	1	8.7	0	0	10	25.8333	6.66667	10	5.83333	1	5	5.5	-30	-5	-5	19.1667	1	1	0	-10
65	35	F	1	2	3	5	7	7.1	0	3	3	20	30																						31.6667				1
66	61	F	1	1	1	2	3	3.1	1	4	9.5	15	45	2.5	4	7		40	2	4	4	15	35	2	4	7	3	20	3	5.3	6	0	1	8.5	14.1667	21.6667	34.1667	18.3333	1	-1.5	0		2.5	5	-7.5	0	0	-3	12
67	56	M	2	1	2	1	1	1.1	0	5	7.5	47	50	0.1	0.1	10	55	62													10	0	0	10	20.8333	1.66667			1	-0.1	4.9	-8	-2.5	-12	19.1667
68	49	M	2	2	2	3	1	1.1	2	8	3	0	55	0.5	2	8	65	130											0.5	2	9.8	0.2	1	9	42.5	28.3333			1	1.5	6	-65	-5	-75	14.1667
69	46	F	1	1	2	1	4	4.2	2	5	5	25	72.5	1.5	2.5	5	34	72																	38.3333	33.3333			1	0.5	2.5	-9	0	0.5	5
70	39	F	1	2	2	3	5	5.4	4	7	6	45	65	2	7	8.5	23	45																	24.1667	20	17.5		1	2	0	22	-2.5	20	4.16667
71	41	F	1	1	2	1	2	2.1	2.5	5	5	0	40	2.5	4	6			0	2.5	8	30	40						0	1.5	9	0.8	2.7	9.4	40.8333	23.3333	15		1	0	1		-1		17.5
72	44	F	1	1	2	1	1	1.1	5	9	8.5	10	35	2	3	9	42	50											0	0.7	10	0.5		10	56.6667	7.5			1	3	6	-32	-0.5	-15	49.1667
73	37	F	1	1	3	5	7	7.1	3	5	7.5	40	55																						27.5				1
74	55	F	1	2	2	3	1	1.1	3	8.5	5.4	0	30	4	6.5	9	25	50											1.5	1.8	10	0.5	0.8		22.5	10			1	-1	2	-25	-3.6	-20	12.5
75	57	F	1	1	1	2	3	3.1	0	7	9	15	40	0	8	8	14	26	0	9	8	19	42	0	4	7	14	28	0	0.5	10	0	0	10	14.1667	12.5	15	5.83333	1	0	-1	1	1	14	1.66667	0	5	1	5
76	45	M	2	2	2	3	2	2.2	4	8	10	25	105	6	8	9	30	85	2	6	9.9	42	105												18.3333	12.5	7.5		1	-2	0	-5	1	20	5.83333
77	40	F	1	2	2	3	1	1.3	4.7	6.5	6.5	32	63	3	4	4	35	65																	40	9.16667			1	1.7	2.5	-3	2.5	-2	30.8333
78	42	M	2	2	3	5	7	7.1	2	3.5	3.5	85	135																						28.3333				1
79	44	F	1	1	1	2	3	3.1	2	2	8.5	15	45	0.5	6	5	24	41	0.5	2.5	8	10	37	0	1	9.5	10	84	0	0	10	0	0	10	10	19.1667	12.5	7.5	1	1.5	-4	-9	3.5	4	-9.16667	0.5	1.5	-1.5	0
80	39	F	1	1	1	2	3	3.1	2	5	7.5	22	55	3.5	6.5	6	20	35	1.5	3.5	8.5	22	42	0.5	2.5	8.5	30	68	0	1	9	0	1	9	22.5	29.1667	25.8333	10.8333	1	-1.5	-1.5	2	1.5	20	-6.66667	1	1	0	-8
81	51	F	1	2	2	3	4	4.1	2.5	5	5	20	50	2.5	4	4	25	45											0.2	1.5	7.7				16.6667	18.3333			1	0	1	-5	1	5	-1.66667
82	45	M	2	2	2	3	1	1.1	2	5	8	35	90	1	3	10	25	100											0.5	2	10	0	0	10	23.3333	6.66667			1	1	2	10	-2	-10	16.6667
83	43	M	2	2	1	4	6	6.1	1.3	7.5	7	22	42	1	4	5	12	28	1	6	5	28	40	1	7	5	20	40							28.3333	22.5	26.6667	24.1667	1	0.3	3.5	10	2	14	5.83333	0	-1	0	8
84	48	M	2	2	2	3	1	1.3	2	7	7.5	80	100	0		8.5	118	127																	37.5	10			1	2		-38	-1	-27	27.5
85	61	M	2	1	1	2	3	3.1	2.5	9	5	35	119	1.5	3.5	9	32	100	1	2	9.5	18	48	0	0.5	10	110	110	0	0.5	10	0	0	10	35.8333	16.6667	10	4.16667	1	1	5.5	3	-4	19	19.1667	1	1.5	-0.5	-92
86	52	F	1	1	3	5	7	7.1	1.5	7.5		23	55																						42.5				1
87	40	F	1	1	3	5	7	7.1	5	7.5	5	40	41																						72.5				1
88				2	3	5	7	7.1	5	7.5	5	35	41																						75.8333				1
89	41	F	1	1	3	5	7	7.1	2.5	5	5	39	41																						35				1
90	46	F	1	1	2	1	2	2.1	1	2.5	9	15	60	0	0.5	9.3	50	70	0	0.3	10	45	80						0	0.2	10	0	0	10	21.6667	18.3333	7.5		1	1	2	-35	-0.3	-10	3.33333
91	51	M	2	2	2	3	1	1.1	5	8	3	15	30	3	6.5	5.5															10	0	0	10	36.6667	16.6667			1	2	1.5		-2.5		20
93	41	F	1	1	2	1	4	4.2	3.3	8.5	6.5	5	36	2	6.5	7.5	10	55																	44.1667	38.3333			1	1.3	2	-5	-1	-19	5.83333
94	50	M	2	1	1	2	3	3.3	0.5	2.5	7.5	100	115	0.5	1.5	8.5	115	120	1	2.5	8	110	120	0	0	10									16.6667	13.3333	14.1667	0	1	0	1	-15	-1	-5	3.33333	1	2.5	-2
95	48	M	2	1	2	1	1	1.1	2	6.5		20	82	2	3.5	7	40	77											0.3	1.8	9	0	0.2	9	28.3333	21.6667			1	0	3	-20		5	6.66667
97	50	M	2	1	2	1	5	5.2	0	1.3				0.3	2	8.5	60	90	3	4	4.5	2	73												20.8333	15	19.1667		1	-0.3	-0.7				5.83333
98	43	M	2	2	2	3	4	4.2	1	3	6	70	125	2.5	7.5	5	100	130																	39.1667	34.1667			1	-1.5	-4.5	-30	1	-5	5
99	45	F	1	2	3	5	7	7.1	2	6	7	35	55																						21.6667				1
100				2	3	5	7	7.1	2	5	8	25	55																						32.5				1
101	44	M	2	2	2	3	5	5.1	2	8	4	30	115	0.4	1.5	8.5	52	123	3	7	7.5	30	110						0.5	1.5	9	0.3	0.6	9.6	25.8333	9.16667	22.5		1	1.6	6.5	-22	-4.5	-8	16.6667
103	40	F	1	1	3	5	7	7.1	0.2	2.5	7.5																								20.8				1
104	43	M	2	2	3	5	7	7.1	4	9.9	9.9	40	70																						28.4				1
105	44	F	1	1	1	2	3	3.1	4	5	5	30	60	6	7		30	45	5	6.5	7.5	10	35	0.2	0.2	9	25	35	0	0	10	1	1	9	20	30	25.8333	9.16667	1	-2	-2	0		15	-10	4.8	6.3	-1.5	-15
106	47	M	2	2	2	3	1	1.1	0.5	7.5	4	35	85	0.5	1	9.5	85	105											0.5	1	9.5	1	0.8	9.4	30	10.8333			1	0	6.5	-50	-5.5	-20	19.1667
107	51	M	2	1	1	2	3	3.2	1.1	5.6		22	40	1	4.2	9	31	47	0.3	4.6	8.7								0	0	10	0	0	10	23.3333	10	10		1	0.1	1.4	-9		-7	13.3333
109	39	F	1	1	1	2	3	3.2	0.5	1	9			0	5	5	20	50			8	17.5	50						0	0.5	10	0	0.5	10	10.8333	6.66667	9.16667		1	0.5	-4		4		4.16667
114	49	F	1	2	2	3	1	1.3	6.5	8	3	10	40	0	1	9																			37.5	10.8333			1	6.5	7		-6		26.6667
115	42	F	1	1	1	2	3	3.3	4	9	1.5			7	7.8	2.8	0	0	8.5	9.5	2.5	0	0	0.3	0.5	6.5	30	52							51.6667	56.6667	55.8333	10	1	-3	1.2		-1.3		-5	8.2	9	-4	-30
116	45	F	1	2	3	5	7	7.1	2.2	3.6	5.2	20	25																						34.2				1
119	54	M	2	2	2	3	5	5.3	2	6	4			1	6	6	25	50	0	6	7	38	42												23.3333	20.8333	18.3333		1	1	0		-2		2.5
120	39	F	1	1	3	5	7	7.1	8	8.5	9.5																								48.3				1
121	38	F	1	1	2	1	5	5.2	2.5	5	7.5	5	25	5	5	10	10	18	1	2	9.5														36.6667	23.3333	15		1	-2.5	0	-5	-2.5	7	13.3333
122	43	F	1	2	2	3	1	1.1	5	7.5	5	5	50	1	1.5	8.5	25	65											2	3	8	2	3	8	28.3333	10			1	4	6	-20	-3.5	-15	18.3333
124	54	F	1	1	2	1	1	1.1	5	8	2.5	0	20	5	5	7.5	20	35											0.7	1	9			8.5	61.6667	22.5			1	0	3	-20	-5	-15	39.1667
125	39	M	2	2	3	5	7	7.1	5	1	8	60	60																						20				1
126	46	F	1	1	2	1	1	1.1	0	4.1	6.5			0.1	1.9	8.1													1.2	2.6	9.3	0.4	2.2	8.5	31.6667	22.5			1	-0.1	2.2		-1.6		9.16667
127	36	M	2	1	1	2	3	3.1	0.2	3.5	7.2			0	3	7.5	50	110	0	2	7.5	60	110	0	0.5	10	48	56	0	0.2	10	0	0	10	19.1667	16.6667	13.3333	1.66667	1	0.2	0.5		-0.3		2.5	0	1.5	-2.5	12
[truncated: 26 more columns]
